# Supplementary material for: Template-free solvothermal synthesis of WO3/WO3·H2O hollow spheres and their enhanced photocatalytic activity from the mixture phase effect
Source: Royal Society of Chemistry journal article supplement (doi:10.1039/c4ce00857j), 2014-01-01
Supplement: c4ce00857j1.pdf [file c4ce00857j1.pdf]

---

Electronic Supplementary Information

---

**Template-free Solvothermal Synthesis of WO<sub>3</sub>/WO<sub>3</sub>·H<sub>2</sub>O Hollow Spheres and Their  
Enhanced Photocatalytic Activity from The Mixture Phase Effect**

Yang Liu,<sup>1</sup> Qi Li,<sup>1\*</sup> Shian Gao,<sup>1</sup> and Jian Ku Shang<sup>1,2</sup>

*<sup>1</sup>Environment Functional Materials Division*

*Shenyang National Laboratory for Materials Science*

*Institute of Metal Research, Chinese Academy of Sciences, Shenyang, 110016, P. R. China*

*<sup>2</sup>Department of Materials Science and Engineering*

*University of Illinois at Urbana-Champaign, Urbana, IL 61801, USA*

\*Corresponding author.

E-mail address: [qili@imr.ac.cn](mailto:qili@imr.ac.cn) (Q. Li).

Tel.: +86-24-83978028; Fax: +86-24-23971215.

Postal address: 72 Wenhua Road, Shenyang, Liaoning Province, 110016, P. R. China.

**The morphology of the sample synthesized with DI H<sub>2</sub>O as the solvent**

Fig. S1 shows the SEM images of the sample synthesized with DI H<sub>2</sub>O as the solvent. The obtained product was composed of both individual nanoflakes and hollow spherical aggregates from nanoflakes with different sizes and shapes.

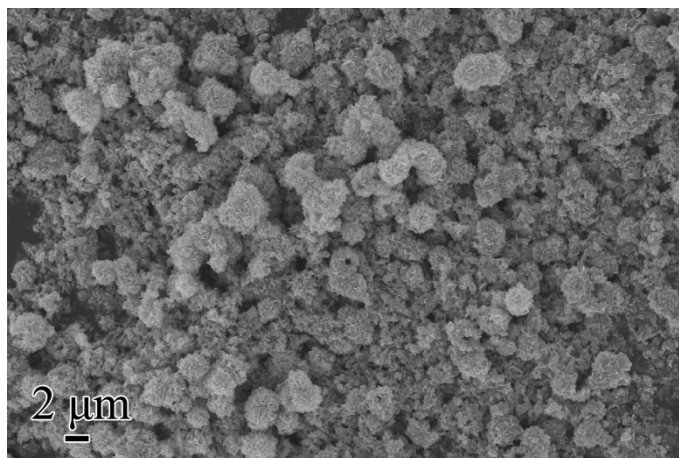

(a)

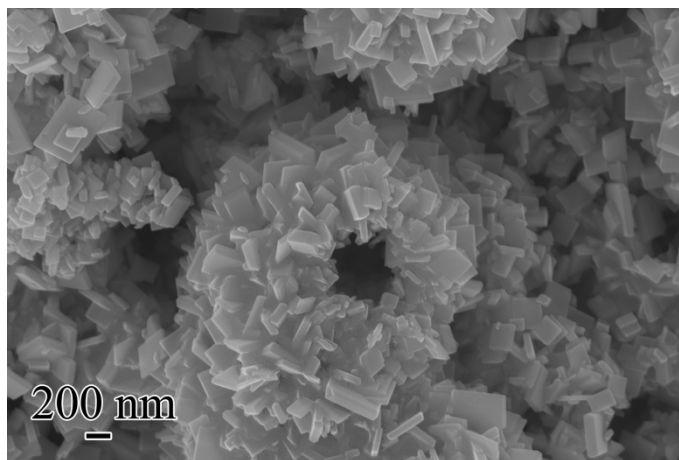

(a)

Fig. S1 SEM images of the sample synthesized with DI H<sub>2</sub>O as the solvent: (a) with a lower magnification, and (b) with a higher magnification on the center part of (a), respectively.

**The morphology of samples calcinated at 350 °C and 500 °C, respectively**

Fig. S2 (a) and (b) show the SEM images of samples calcined at 350 °C and 500 °C, respectively. It could be found that samples after calcination kept their hollow sphere morphology.

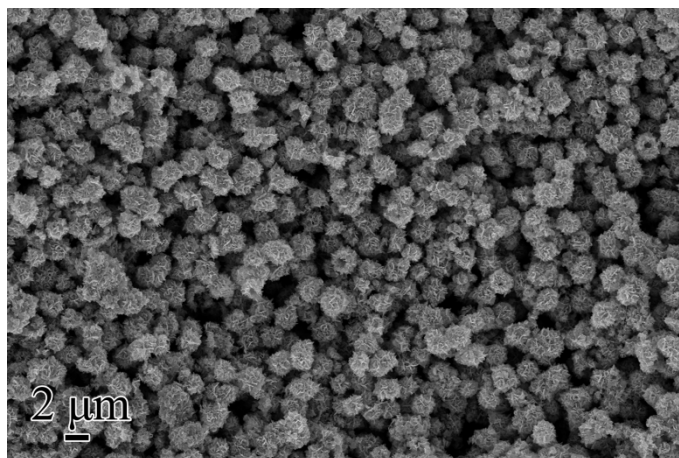

(a)

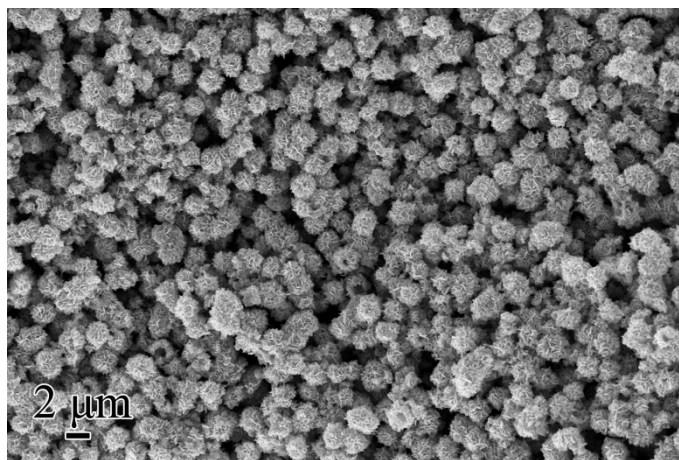

(b)

Fig. S2 SEM images of the samples calcinated at (a) 350 °C and (b) 500 °C.

### Estimation of the CB and VB edges of WO<sub>3</sub> and WO<sub>3</sub>·H<sub>2</sub>O

The conduction band (CB) bottom values and valence band (VB) top values of the two semiconductors could be estimated by Eq. (S1) and Eq. (S2):<sup>1</sup>

$$E_{CB} \approx X_{comp} - E^e - 1/2E_g \quad (S1)$$

$$E_{VB} = E_{CB} + E_g \quad (S2)$$

where  $E^e$  equals 4.5 eV and  $X_{comp}$  is the the electronegativity of a compound.

$X_{comp}$  could be calculated from Eq. (S3):<sup>2</sup>

$$X_{comp} = (X_1^r X_2^s \cdots X_{n-1}^p X_n^q)^{1/N} \quad (S3)$$

where  $X_n$ ,  $n$  and  $N$  are the electronegativity of the constituent atom, the number of species, and the total number of atoms in the compound, respectively. The superscripts  $r$ ,  $s$ ,  $p$  and  $q$  refer to the numbers of the atoms 1, 2,  $n-1$ , and  $n$ , respectively, in the molecule. Thus,  $r + s + \cdots + p + q = N$ .

The values of  $X_n$  could be found from in literature<sup>3</sup> that  $X_O = 7.54$  eV,  $X_W = 4.4$  eV, and  $X_H = 7.18$  eV, respectively.

Thus, for WO<sub>3</sub>:

$$X_{WO3} = (4.4 * 7.54^3)^{1/4} = 6.59 \text{ eV}$$

$$E_{CB} = 6.59 - 4.5 - 0.5 * 2.72 = 0.73 \text{ eV}$$

$$E_{VB} = 0.73 + 2.72 = 3.45 \text{ eV}$$

For WO<sub>3</sub>·H<sub>2</sub>O:

$$X_{WO3 \cdot H2O} = (4.4 * 7.54^4 * 7.18^2)^{1/7} = 6.885 \text{ eV}$$

$$E_{CB} = 6.885 - 4.5 - 0.5 * 2.35 = 1.21 \text{ eV}$$

$$E_{VB} = 1.21 + 2.35 = 3.56 \text{ eV}$$

**References:**

1. P. Wang, B. Huang, X. Zhang, X. Qin, Y. Dai, H. Jin, J. Wei, M.H. Whangbo, *Chem. Eur. J.*, 2008, **14**, 10543.
2. R. T. Sanderson, *Chemical Periodicity*, Reinhold, New York, 1960.
3. R. G. Pearson, *Inorg. Chem.*, 1988, **27**, 734.
